# Supplementary material
Source: PubMed Central journal article supplement (PMC8903840)
Supplement: mmc1.pdf [file mmc1.pdf]

# THE LANCET

## Public Health

### **Supplementary appendix**

This appendix formed part of the original submission and has been peer reviewed. We post it as supplied by the authors.

Supplement to: Bartsch SM, O'Shea KJ, Chin KL, et al. Maintaining face mask use before and after achieving different COVID-19 vaccination coverage levels: a modelling study. *Lancet Public Health* 2022; published online March 8. [https://doi.org/10.1016/S2468-2667\(22\)00040-8](https://doi.org/10.1016/S2468-2667(22)00040-8).

# Appendix to: Maintaining Face Mask Use Before and After Achieving Different COVID-19 Vaccination Coverage Levels: A Modelling Study

Appendix Figure 1. Model structure A) transmission model and B) probability tree of different age-specific outcomes that infections persons travel through. The individual has an age drawn from the age-distribution of U.S. population and accrues relevant age-specific costs and health effects.

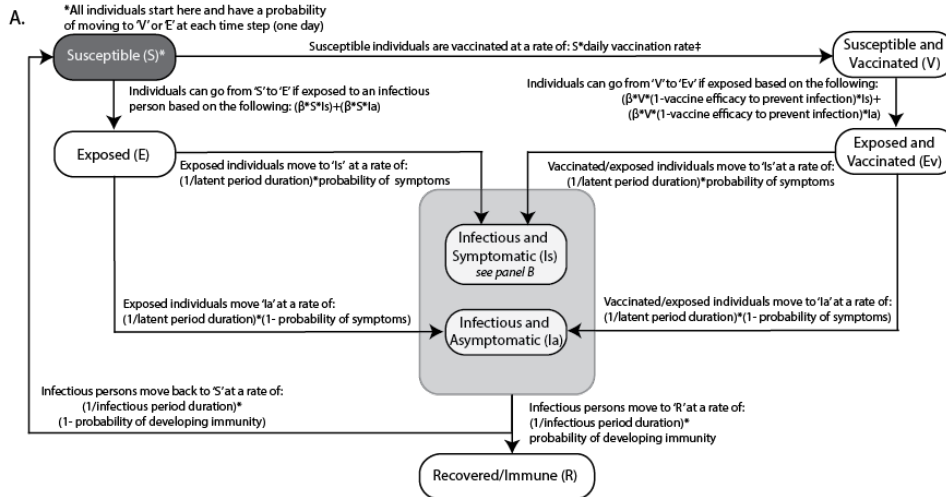

$\beta$  = beta, the transmission coefficient and equals  $R_t/\text{infectious period duration}/\text{population size}$ .  
 $R_t$  is the reproductive rate of the virus on a given day (t) and is the  $R_0$  (the number of secondary cases generated by a single infectious case in a fully susceptible population) adjusted by observed seasonal variation.  
 The latent period is the time between exposure and ability to transmit. Infectious individuals can transmit prior to symptom onset.  
 When face masks are used,  $R_t = R_0 \cdot (1 - \text{Face Mask Effectiveness})$

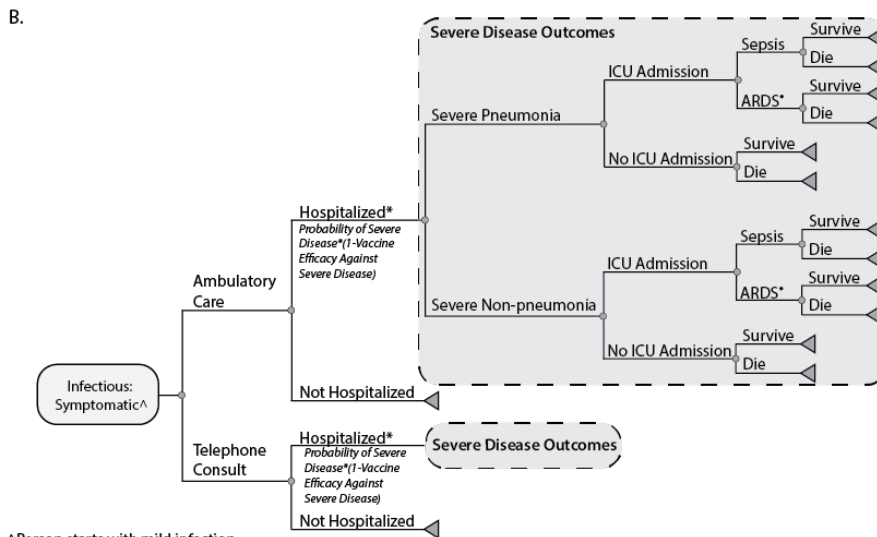

^Person starts with mild infection  
 \*Person progresses to severe disease requiring hospitalization  
 \*ARDS= acute respiratory distress syndrome, with or without sepsis  
 Each COVID-19 infection loses QALY values based on age-dependent healthy QALY value and infection-specific utility weights for infection duration. Absenteeism results in productivity losses for symptom duration.

Appendix Figure 2. Example model structure stratifying by age.

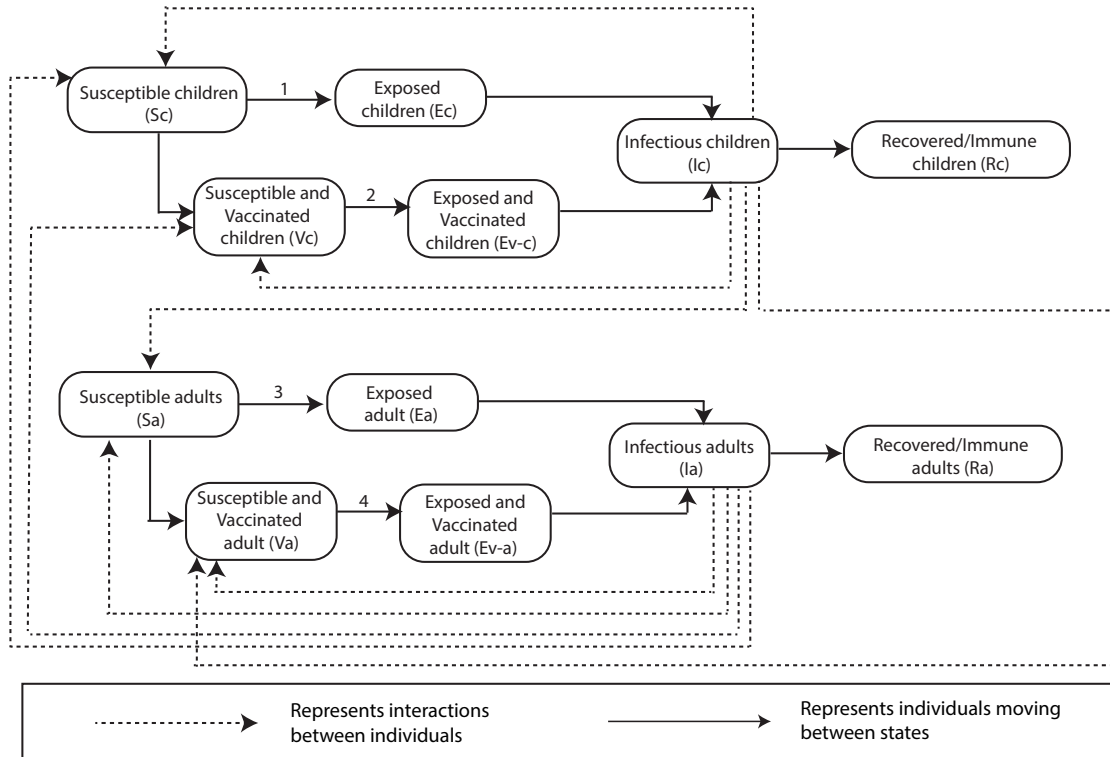

Where not otherwise noted, movement between states is governed by the same equations shown in Appendix Figure 1.

Adults and children have different probabilities of interacting within and between age groups, resulting in moving from susceptible to exposed compartments based on the following equations:

1. Movement from Sc to Ec:  $(\beta_{c-c} * Sc * Ic) + (\beta_{a-c} * Sc * Ia)$
2. Movement from Vc to Ev-c:  $(\beta_{c-c} * Vc * Ic) + (\beta_{a-c} * Vc * Ia)$
3. Movement from Sa to Ea:  $(\beta_{c-a} * Sa * Ic) + (\beta_{a-a} * Sa * Ia)$
4. Movement from Va to Ev-a:  $(\beta_{c-a} * Va * Ic) + (\beta_{a-a} * Va * Ia)$

$\beta_{a-a}$ : transmission coefficient representing interactions between infectious adults and susceptible adults;  
 $\beta_{c-c}$ : transmission coefficient representing interactions between infectious children and susceptible children;  
 $\beta_{a-c}$ : transmission coefficient representing interactions between infectious adults and susceptible children;  
 $\beta_{c-a}$ : transmission coefficient representing interactions between infectious children and susceptible adults

### Data Sources

Appendix Table 1 shows key model input parameters, values, and sources. All costs, clinical probabilities, and durations were age-specific when available and come from scientific literature or nationally representative data sources [e.g., Centers for Medicare and Medicaid Services (CMS)]. In the absence of literature, data from the CDC was preferred. In the absence of specific data, the probability of diagnosis given symptoms, derived from seroprevalence surveys and case reports, served as a proxy for the probability of ambulatory care.<sup>1</sup> The cost of face masks, consisted of the cost of disposable masks (surgical: \$0.08, N95: \$0.50<sup>2</sup>), how often masks disposable masks are replaced (average of once every two days<sup>3</sup>), the cost of cloth masks (amortized to \$0.014 per day assuming a person has two masks at \$2.50 per mask and they last for one year<sup>4,5</sup>), and the cost to wash masks (average \$0.007 per day, based on the average cost per load of laundry<sup>6,7</sup>) and recommendations to wash daily<sup>4</sup>). Based on the proportion of each

type of mask used (i.e., N95, surgical, cloth)<sup>8</sup> early in the pandemic (March-July 2020) and how often each type of mask was replaced<sup>3</sup>, this equals \$0.32 per person per day. As cost data come from several sources published across different years, we utilized a standard 3% rate to inflate all past costs, regardless of year, per recommendations from the Panel of Cost-Effectiveness in Health and Medicine.<sup>9,10</sup> Appendix Figure 4 shows the impact of varying key parameters on model outcomes when using face masks while Appendix Figure 5 shows how key model outcomes change when varying values of model input parameters in Appendix Table 1.

### *Model Calibration and Validation*

We calibrated the model such that number of cases reflected case data reported as of October 1, 2021<sup>11</sup> (last date of reported data at the time) given available evidence on underreporting in the US<sup>12-14</sup> as well as vaccination rates over time (55.9% fully vaccinated by October 1).<sup>15</sup> This was equivalent to 52.3 million in the unvaccinated susceptible compartment, 89.3 million in the vaccinated susceptible compartment, 0.7 million unvaccinated exposed, 0.1 million vaccinated exposed, 1.0 million symptomatic unvaccinated cases, 0.8 million asymptomatic unvaccinated cases, 0.2 million symptomatic vaccinated cases, 0.2 million asymptomatic vaccinated cases, and 182.6 million recovered. As predicting the specific course of the current pandemic can be challenging with such variations in the application of social distancing measures and face mask use policies as well as variations in the types and efficacy of face masks, we simulated general non-pharmaceutical intervention (NPI) use until October 1, 2021. For example, NPIs used at various points through the pandemic include use of face masks, social distancing, school closures, curfews/gathering limits, and closing of non-essential businesses, however these NPIs and mandates vary greatly by state.<sup>16-19</sup> We fit  $R_t$  (i.e., average number of secondary cases generated by one infectious case at time  $t$ ) to estimate the shape of the pandemic curve (using the rolling 7-day average) and new incident cases through October 1, 2021.<sup>11</sup> This fitting of  $R_t$  allows us to represent various conditions such as NPIs and their compliance, seasonal variations in respiratory virus transmission, and more transmissible variants. Modeled cases (i.e., simulated truth) were higher than reported cases, given that not all cases are diagnosed, resulting in underreporting.<sup>12-14</sup>

We also performed model validation including face validity and criterion validity. We achieved face validity as the progression of the simulated unmitigated epidemic proceeded in a trend following widely accepted epidemiological trends. For example, the peak number of cases per day (e.g., the peak of the epidemic curve) occurred when the population achieved herd immunity, which aligns with previously demonstrated trends in population infection control. For criterion validation, we compared the number of simulated age-stratified infections and deaths with NPIs to CDC age-stratified data from day 602. Day 602 corresponds to the most recent date of available COVID-19 data from the CDC (October 1, 2021<sup>20-21</sup>), assuming that community spread began in the US at the beginning of February 2020. Appendix Table 2 shows the age-stratified simulated data compared to the available CDC data. To note, there are a number of limitations to the CDC data when making comparisons. The hospitalization data is published in rates per 100,000, which we extrapolate to estimate total hospitalizations in the population. The hospitalization data also have many missing data points and has a 15-day lag. Additionally, an overall limitation of surveillance data is the inability to capture the cases in

individuals who do not seek testing. Given these limitations, we expect there to be some discrepancy between model-simulated data and CDC reported data, but the overall trends and patterns hold.

Appendix Table 1. Model input parameters, values, and sources.

| Parameter                                                                                                             | Distribution Type | Mean or Median | Standard Error or Range                   | Source     |
|-----------------------------------------------------------------------------------------------------------------------|-------------------|----------------|-------------------------------------------|------------|
| <b>COVID-19 Coronavirus Transmission</b>                                                                              |                   |                |                                           |            |
| Seasonality scaling factor for $R_t$                                                                                  |                   |                |                                           |            |
| Spring and fall                                                                                                       | Point Estimate    | 0.659          | -                                         | 22         |
| Summer                                                                                                                | Point Estimate    | 0.318          | -                                         | 22         |
| Winter                                                                                                                | Point Estimate    | 1              | -                                         | 22         |
| Latent period (days)                                                                                                  | Triangular        | 5.2            | 4.1-7.0                                   | 23         |
| Infectious period (days)                                                                                              | Uniform           | -              | 4-15                                      | 24-27      |
| <b>Costs (2021 US\$)*</b>                                                                                             |                   |                |                                           |            |
| Surgical face masks                                                                                                   | Point Value       | 0.08           | ranged in sensitivity analyses: 0.16-0.24 | 2          |
| N95 face masks                                                                                                        | Point Value       | 0.50           | ranged in sensitivity analyses: 1-1.50    | 2          |
| Cloth face masks                                                                                                      | Point Value       | 2.50           | ranged in sensitivity analyses: 5-7.5     | Assumption |
| Washing a cloth face mask (per day)                                                                                   | Point Value       | 0.007          | -                                         | 4,6,7      |
| COVID-19 vaccine (per dose)                                                                                           | Point Value       | 20             | -                                         | 28         |
| Vaccination administration (per dose for administering the vaccine, supplies, public health reporting <sup>29</sup> ) | Point Value       | 40             | -                                         | 30         |
| Annual wages (all occupations; proxy for productivity losses)                                                         | Beta Pert         | 42,223         | 21,950-104,403 <sup>a</sup>               | 31         |
| Ambulatory care visit                                                                                                 | Uniform           | -              | 110.43-148.33                             | 32         |
| Over the counter medications, daily                                                                                   |                   |                |                                           |            |
| 0-12 years old <sup>b</sup>                                                                                           | Gamma             | 3.99           | 2.10                                      | 33         |
| ≥13 years old <sup>c</sup>                                                                                            | Gamma             | 0.47           | 0.17                                      | 33         |
| Hospitalization for pneumonia <sup>d</sup>                                                                            |                   |                |                                           |            |
| 0-17 years old                                                                                                        | Gamma             | 12,877.37      | 1,508.04                                  | 34         |
| 18-44 years old                                                                                                       | Gamma             | 10,945.96      | 1,045.06                                  | 34         |
| 45-64 years old                                                                                                       | Gamma             | 14,129.68      | 1,238.76                                  | 34         |
| 65-84 years old                                                                                                       | Gamma             | 12,632.32      | 478.40                                    | 34         |
| ≥85 years old                                                                                                         | Gamma             | 11,312.21      | 518.29                                    | 34         |
| Hospitalization for severe non-pneumonia (all ages) <sup>e</sup>                                                      | Gamma             | 7,093.13       | 1,182.99                                  | 34         |
| Hospitalization for sepsis <sup>f</sup>                                                                               |                   |                |                                           |            |
| 0-17 years old <sup>g</sup>                                                                                           | Gamma             | 23,375.13      | 1,861.33                                  | 34         |
| 18-44 years old                                                                                                       | Gamma             | 45,091.74      | 5,382.40                                  | 34         |
| 45-64 years old                                                                                                       | Gamma             | 39,896.27      | 2,725.10                                  | 34         |
| 65-84 years old                                                                                                       | Gamma             | 31,217.54      | 1,367.91                                  | 34         |
| ≥85 years old                                                                                                         | Gamma             | 23,375.13      | 1,861.33                                  | 34         |
| Hospitalization for ARDS <sup>h</sup>                                                                                 |                   |                |                                           |            |
| 0-17 years old                                                                                                        | Gamma             | 43,621.10      | 4,198.97                                  | 34         |
| 18-44 years old                                                                                                       | Gamma             | 26,997.29      | 1,558.61                                  | 34         |

|                                                                |                |           |                                  |                         |
|----------------------------------------------------------------|----------------|-----------|----------------------------------|-------------------------|
| 45-64 years old                                                | Gamma          | 20,459.90 | 453.92                           | 34                      |
| 65-84 years old                                                | Gamma          | 19,280.11 | 335.69                           | 34                      |
| ≥85 years old                                                  | Gamma          | 17,056.54 | 754.12                           | 34                      |
| Hospitalization for myocarditis                                | Gamma          | 35,289.60 | 2,222.34                         | 34                      |
| Hospitalization for pericarditis                               | Gamma          | 16,002.76 | 291.16                           | 34                      |
| Hospitalization for allergic reaction/anaphylaxis <sup>l</sup> | Triangular     | 7,753.38  | 6,774.80 - 8,280.31 <sup>j</sup> | 34                      |
| <b>Probabilities</b>                                           |                |           |                                  |                         |
| Face mask effectiveness                                        | Beta Pert      | 0.18      | 0.16-0.20 <sup>a</sup>           | 35                      |
| Using surgical masks                                           | Point Estimate | 0.2       | -                                | 8                       |
| Using N95 masks                                                | Point Estimate | 0.345     | -                                | 8                       |
| Using cloth masks                                              | Point Estimate | 0.455     | -                                | 8                       |
| Developing immunity after infection (seroconversion)           | Point Estimate | 0.91      | -                                | 36,37                   |
| Vaccine efficacy against COVID-19 hospitalization              | Beta Pert      | 0.86      | 0.82-0.89 <sup>a</sup>           | 38                      |
| Side effects due to vaccination                                |                |           |                                  |                         |
| Minor                                                          | Uniform        | -         | 0.33 - 0.42                      | 39-41                   |
| Severe: myocarditis/pericarditis                               | Uniform        | 0.000023  | 0.0000156-0.000027 <sup>a</sup>  | 42                      |
| Severe: allergic reaction/anaphylaxis                          | Triangular     | -         | 0.000003 - 0.000011              | 43,44                   |
| Asymptomatic infection                                         | Triangular     | 0.45      | 0.305-0.495 <sup>j</sup>         | 45,46                   |
| Relative infectiousness of asymptomatic infection              | Point Estimate | 1         | -                                | 46                      |
| Missing work/school                                            | Point Estimate | 1.0       | -                                | Assumption              |
| Ambulatory care                                                | Triangular     | 0.15      | 0.06-0.26                        | 1                       |
| Hospitalization, given infection                               |                |           |                                  |                         |
| 0-17 years old                                                 | Beta Pert      | 0.0092    | 0.0081-0.0101 <sup>j</sup>       | 12                      |
| 18-44 years old                                                | Beta Pert      | 0.0081    | 0.0073-0.0089 <sup>j</sup>       | 12                      |
| 45-64 years old                                                | Beta Pert      | 0.0826    | 0.0744-0.909 <sup>j</sup>        | 12                      |
| ≥65 years old                                                  | Beta Pert      | 0.257     | 0.2314-0.2828 <sup>j</sup>       | 12                      |
| ICU admission, given hospitalization                           |                |           |                                  |                         |
| 0-17 years old                                                 | Beta Pert      | 0.171     | 0.154-0.1881 <sup>j</sup>        | 47                      |
| 18-44 years old                                                | Beta Pert      | 0.238     | 0.214-0.262 <sup>j</sup>         | 48                      |
| 45-64 years old                                                | Beta Pert      | 0.361     | 0.325-0.397 <sup>j</sup>         | 48                      |
| ≥65 years old                                                  | Beta Pert      | 0.353     | 0.318-0.388 <sup>j</sup>         | 48                      |
| Mortality, given hospitalization                               |                |           |                                  |                         |
| 0-17 years old                                                 | Beta Pert      | 0.0061    | 0.0055-0.0067 <sup>j</sup>       | 12,49                   |
| 18-44 years old                                                | Beta Pert      | 0.089     | 0.0801-0.0979 <sup>j</sup>       | 12,49                   |
| 45-64 years old                                                | Beta Pert      | 0.058     | 0.0520-0.0635 <sup>j</sup>       | 12,49                   |
| ≥65 years old                                                  | Beta Pert      | 0.155     | 0.1392-0.1702 <sup>j</sup>       | 12,49                   |
| Pneumonia, given hospitalization                               | Beta           | 0.79      | 0.711-0.869 <sup>k</sup>         | 50                      |
| ARDS, requiring ventilator use in ICU                          | Beta           | 0.771     | 0.053                            | 51-55                   |
| Reduced work productivity (presenteeism) due to long COVID     | Triangular     | 0.452     | 0.429-0.472                      | 56                      |
| <b>Durations (days)</b>                                        |                |           |                                  |                         |
| Get vaccinated in any setting (hours)                          | Uniform        | -         | 0.1-2                            | 57                      |
| Minor side effects                                             | Uniform        |           | 1-2                              | Assumption <sup>l</sup> |
| Ambulatory care                                                | Point Estimate | 0.5       | -                                | Assumption              |
| Duration of symptoms with mild illness                         | Triangular     | 7         | 3-17                             | 26,58,59                |
| Duration of symptoms prior to hospital admission               | Triangular     | 7         | 3-9 <sup>m</sup>                 | 60,61                   |

|                                                                                                          |                |       |                                           |          |
|----------------------------------------------------------------------------------------------------------|----------------|-------|-------------------------------------------|----------|
| Hospitalization, not admitted to ICU                                                                     |                |       |                                           |          |
| 0-49 years old                                                                                           | Beta Pert      | 3     | 2-5 <sup>k</sup>                          | 48       |
| 50-64 years old                                                                                          | Beta Pert      | 4     | 2-7 <sup>k</sup>                          | 48       |
| ≥65 years old                                                                                            | Beta Pert      | 6     | 3-10 <sup>k</sup>                         | 48       |
| Hospitalization, ICU (all ages)                                                                          | Gamma          | 9     | 4-17 <sup>k</sup>                         | 53-55,62 |
| Hospitalization, ventilator use                                                                          | Gamma          | 9     | 5-12 <sup>k</sup>                         | 53,54,63 |
| Hospitalization, myocarditis                                                                             | Gamma          | 5.9   | 0.28                                      | 34       |
| Hospitalization, pericarditis                                                                            | Gamma          | 4.8   | 0.06                                      | 34       |
| Hospitalization, allergic reaction/anaphylaxis                                                           | Gamma          | 2.3   | 2.1-2.5                                   | 34       |
| Reduced productivity (presenteeism) due to long COVID                                                    | Point Estimate | 182   | -                                         | 56       |
| <b>Numbers</b>                                                                                           |                |       |                                           |          |
| Cloth masks per person                                                                                   | Point Estimate | 2     | -                                         | 4        |
| Disposable masks per day (average)                                                                       | Point Estimate | 0.515 | ranged in sensitivity analyses: 0.62-0.77 | 3        |
| <b>Utility weights</b>                                                                                   |                |       |                                           |          |
| Healthy QALY                                                                                             |                |       |                                           |          |
| <17 years old                                                                                            | Point Estimate | 1     | -                                         | 64       |
| 18-64 years old                                                                                          | Point Estimate | 0.92  | -                                         | 64       |
| ≥65 years old                                                                                            | Point Estimate | 0.84  | -                                         | 64       |
| Mild non-specific symptoms <sup>n</sup>                                                                  | Beta           | 0.648 | 0.103                                     | 65-74    |
| Hospitalized, non-pneumonia symptoms <sup>o</sup>                                                        | Beta           | 0.514 | 0.089                                     | 67,74,75 |
| Pneumonia                                                                                                | Beta           | 0.496 | 0.17                                      | 76-80    |
| Sepsis                                                                                                   | Beta           | 0.467 | 0.18                                      | 80-86    |
| ARDS                                                                                                     | Triangular     | 0.10  | 0.08-0.15                                 | 87       |
| Long COVID symptoms (fatigue, dyspnea, myalgia; proxy for reduction in productivity, i.e., presenteeism) | Uniform        |       | 0.66-0.79                                 | 88-97    |

\*Note: We utilized a standard 3% rate to inflate all past costs, regardless of year, per recommendations from the Panel of Cost-Effectiveness in Health and Medicine.<sup>9,10</sup> Absenteeism results in productivity losses for the symptom duration. Presenteeism productivity losses are calculated by attenuating an individual's wage by the utility weight for long COVID symptoms. Vaccinated individuals could get 2 or 3 doses (e.g., booster) and accrued productivity losses for the time to get vaccinated. Hospitalization costs include the cost for the entire hospital stay, excluding professional (for example, physician) fees.

<sup>a</sup>Values are 95% confidence interval

<sup>b</sup>Assumes 5 to 10 mg/kg of ibuprofen orally every 6 to 8 hours as needed OR 10 to 15 mg/kg of acetaminophen orally every 4 to 6 hours as needed

<sup>c</sup>Assumes 200 mg of ibuprofen or acetaminophen orally every 4 to 6 hours as needed

<sup>d</sup>Uses International Classification of Diseases, Tenth Revision, Clinical Modification (ICD10) code #J13

Pneumonia due to Streptococcus pneumoniae

<sup>e</sup>Uses International Classification of Diseases, Tenth Revision, Clinical Modification (ICD10) code #J11.89

Influenza due to unidentified influenza virus with other manifestations

<sup>f</sup>Uses International Classification of Diseases, Tenth Revision, Clinical Modification (ICD10) code #R65.21

Severe sepsis with septic shock

<sup>g</sup>Data for age-group unavailable and uses lowest values of all age-groups as a proxy

<sup>h</sup>Uses International Classification of Diseases, Tenth Revision, Clinical Modification (ICD10) code #J96.22 Acute and chronic respiratory failure with hypercapnia for 18 years and older and ICD10 code #J96.20 Acute and chronic respiratory failure, unspecified whether with hypoxia or hypercapnia for 0 to 17-year olds

<sup>i</sup>Uses International Classification of Diseases, Tenth Revision, Clinical Modification (ICD10) code #T78.2  
Anaphylactic shock, unspecified

<sup>j</sup>Values are a relative +/- 10% of the mean or median value

<sup>k</sup>Values are interquartile range

<sup>l</sup>Uses data from influenza vaccinations as a proxy

<sup>m</sup>Values are 10%-90%

<sup>n</sup>Uses influenza without hospitalization as a proxy

<sup>o</sup>Uses influenza with hospitalization as a proxy



Appendix Table 2. Model-generated clinical outcomes and CDC/COVID-NET reported data

| SARS-CoV-2                                                                         |            |                   |                    |               |
|------------------------------------------------------------------------------------|------------|-------------------|--------------------|---------------|
|                                                                                    | Infections | Symptomatic Cases | Hospitalizations** | Number Deaths |
| <b>Model-generated outcomes through October 1, 2021</b>                            |            |                   |                    |               |
| All ages                                                                           |            | 100,073,580.33    | 6,739,440          | 787,375       |
| 0 to 17                                                                            |            | 22,451,302.25     | 205,931            | 1,263         |
| 18 to 44                                                                           |            | 35,920,131.12     | 289,612            | 25,784        |
| 45 to 64                                                                           |            | 25,664,556.85     | 2,120,687          | 122,454       |
| ≥65                                                                                |            | 16,037,590.11     | 4,123,210          | 637,874       |
| <b>CDC Data (note different age groups and for which missing data is reported)</b> |            |                   |                    |               |
| <b>Total*</b>                                                                      | 35,502,419 |                   | 2,420,372          | 589,172       |
| 0 to 17                                                                            | 5,279,186  |                   | 44,100             | 718           |
| 18 to 49                                                                           | 18,859,138 |                   | 512,061            | 34,415        |
| 50 to 64                                                                           | 6,842,295  |                   | 845,743            | 97,988        |
| ≥65                                                                                | 4,521,800  |                   | 1,018,468          | 456,051       |

NOTE: Cases and Death counts reported by CDC as of October 1, 2021<sup>21</sup>; hospitalizations and ICU admissions reported by CDC through October 1, 2021<sup>20</sup>

\*Age group not available for 2% of cases and 1% of deaths

\*\* The Coronavirus Disease 2019 (COVID-19)-Associated Hospitalization Surveillance Network (COVID-NET) hospitalization data are preliminary and subject to change as more data become available. In particular, case counts and rates for recent hospital admissions are subject to lag. As data are received each week, prior case counts and rates are updated accordingly. COVID-NET conducts population-based surveillance for laboratory-confirmed COVID-19-associated hospitalizations in children (less than 18 years of age) and adults. COVID-NET covers nearly 100 counties in the 10 Emerging Infections Program (EIP) states (CA, CO, CT, GA, MD, MN, NM, NY, OR, TN) and four Influenza Hospitalization Surveillance Project (IHSP) states (IA, MI, OH, and UT). Incidence rates (per 100,000 population) are calculated using the National Center for Health Statistics' (NCHS) vintage 2019 bridged-race postcensal population estimates for the counties included in the surveillance catchment area. **The rates provided are likely to be underestimated as COVID-19 hospitalizations might be missed due to test availability and provider or facility testing practices.***[emphasis added]*<sup>198</sup>

### Appendix Figure 3. How cost-savings/cost-effectiveness of face masks use changes with the cost of face masks.

A) When achieving final vaccination coverage levels by March 1, 2022

Vaccinating with a 70% vaccine efficacy, SARS-CoV-2  $R_0$  of 5

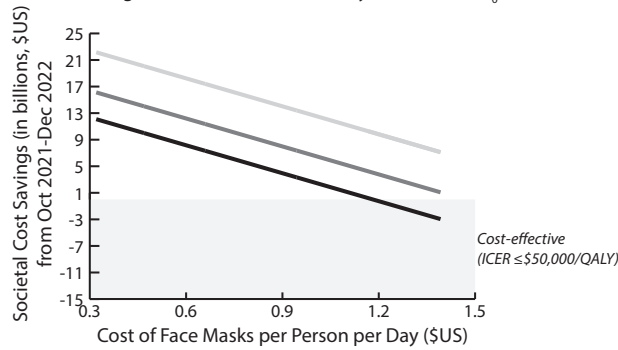

Vaccinating with a 50% vaccine efficacy, SARS-CoV-2  $R_0$  of 5

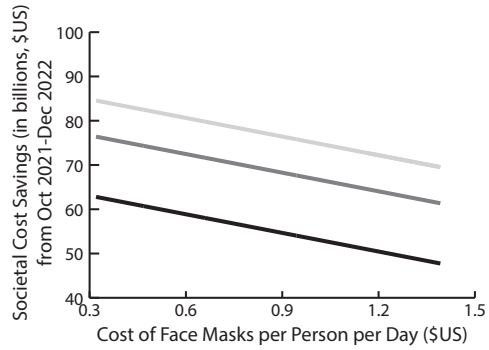

B) When achieving final vaccination coverage levels by May 1, 2022

Vaccinating with a 70% vaccine efficacy, SARS-CoV-2  $R_0$  of 5

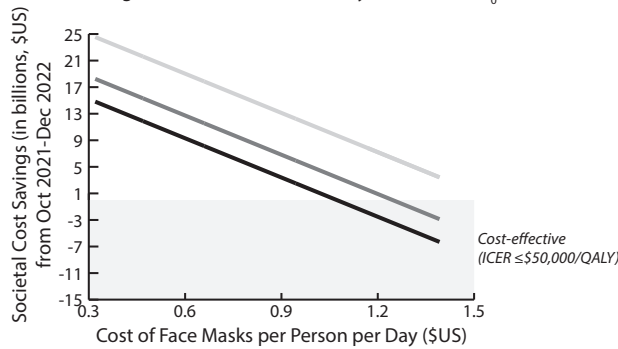

Vaccinating with a 50% vaccine efficacy, SARS-CoV-2  $R_0$  of 5

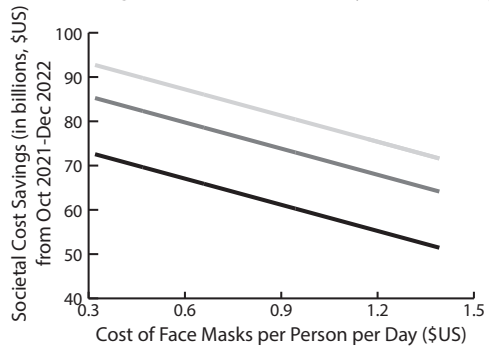

C) When achieving final vaccination coverage levels by July 1, 2022

Vaccinating with a 70% vaccine efficacy, SARS-CoV-2  $R_0$  of 5

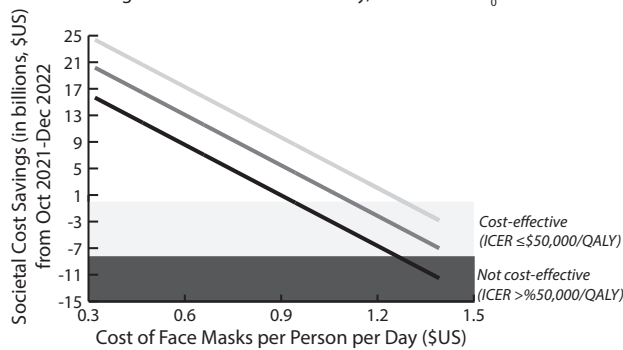

Vaccinating with a 50% vaccine efficacy, SARS-CoV-2  $R_0$  of 5

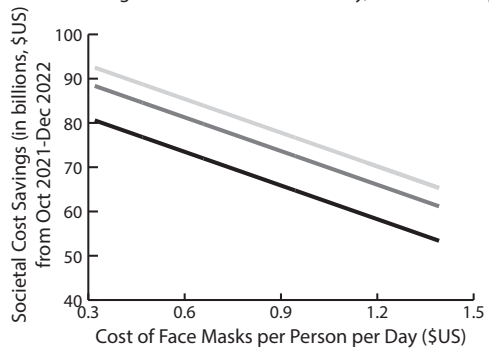

Maintaining face mask use when achieving a:

- 70% final vaccination coverage — lightest line
- 80% final vaccination coverage — middle line
- 90% final vaccination coverage — darkest line

Appendix Figure 4. Impact of key parameters on A) SARS-CoV-2 cases, B) COVID-19 associated deaths, and C) direct medical costs when using face masks. The x-axis shows the magnitude of the impact when parameters are varied to their minimum and maximum values. The vertical line at zero indicates the point at which all variables on the y-axis are held at their midpoint value. The width of the bar shows the range of the impact each parameter had when varied from its minimum value to its maximum value.

A. Impact on SARS-CoV-2 Cases

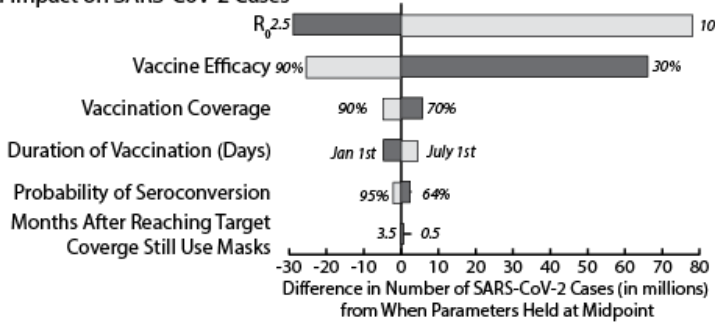

B. Impact on COVID-19 Associated Deaths

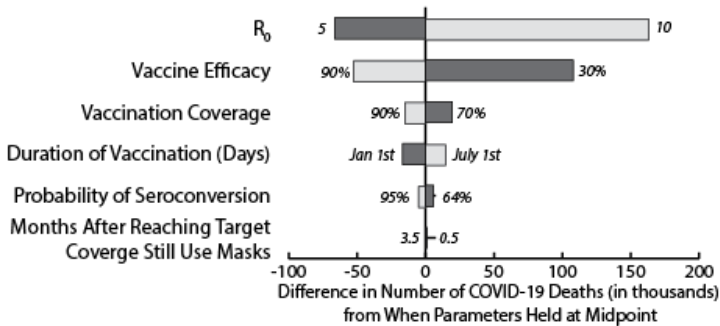

C. Impact on Direct Medical Costs (billions)

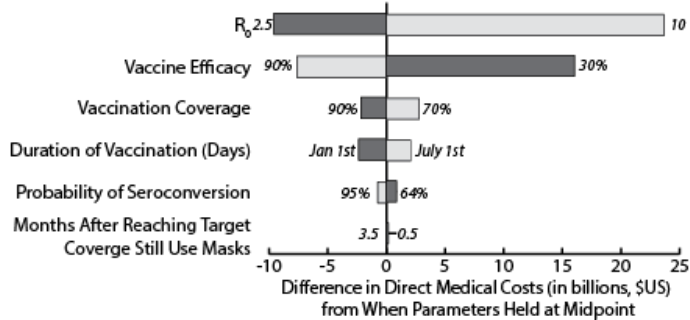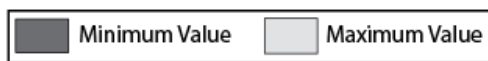

Appendix Figure 5. Impact of model input parameters (Appendix Table 1) on total SARS-CoV-2 infections and total societal costs with a vaccine that prevents infection (70% vaccine efficacy) and severe disease and maintaining face mask use when achieving an 80% vaccination coverage level and protection onset occurs by March 1, 2022 with an  $R_0$  of 5. The x-axis shows the magnitude of the impact when parameters are varied to the minimum and maximum ends of their ranges; midpoint line on the x-axis indicates the point for the target result at which all variables on the y-axis are held at their midpoint values. The width of the bar shows the range of impact that each parameter had when varied from its minimum to maximum value. To note, plots of total cases only include those parameters that affect this number (e.g., costs of hospitalization, etc. are not included) while plots of costs only include the top 10 parameters that impacted this value, which account for 99.9% of variation.

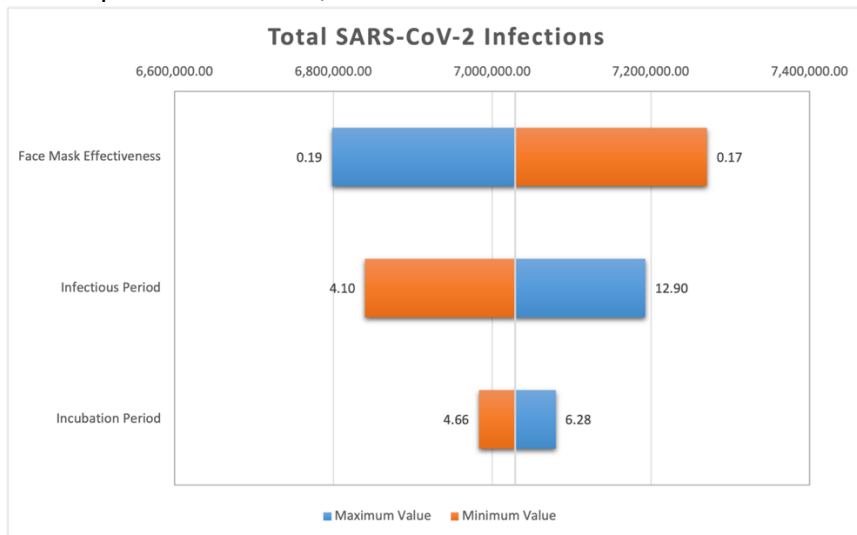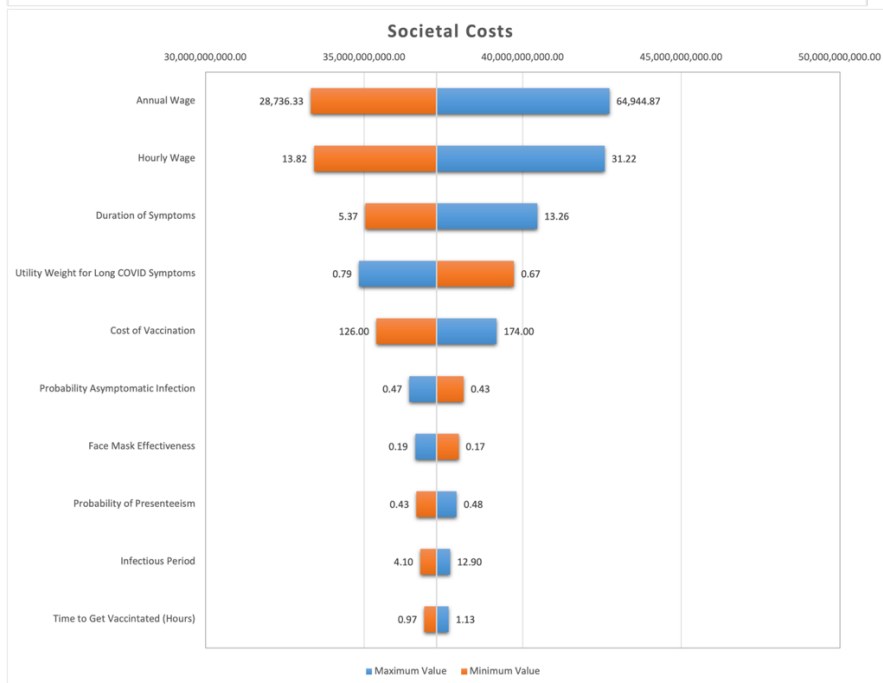

## References

1. Havers FP, Reed C, Lim T, et al. Seroprevalence of Antibodies to SARS-CoV-2 in 10 Sites in the United States, March 23-May 12, 2020. *JAMA Intern Med* 2020.
2. Dugdale CM, Walensky RP. Filtration Efficiency, Effectiveness, and Availability of N95 Face Masks for COVID-19 Prevention. *JAMA Intern Med* 2020; **180**(12): 1612-3.
3. Selvaranjan K, Navarathnam S, Rajeev P, Ravintherakumaran N. Environmental challenges induced by extensive use of face masks during COVID-19: A review and potential solutions. *Environmental Challenges* 2021; **3**: 100039.
4. Chughtai AA, Seale H, Macintyre CR. Effectiveness of Cloth Masks for Protection Against Severe Acute Respiratory Syndrome Coronavirus 2. *Emerg Infect Dis* 2020; **26**(10).
5. Sankhyan S, Heinselman KN, Ciesielski PN, et al. Filtration Performance of Layering Masks and Face Coverings and the Reusability of Cotton Masks after Repeated Washing and Drying. 2021; **21**(11): 210117.
6. Matteson J. Cost of Doing Laundry at Home August 13, 2018. <https://lula.life/cost-of-doing-laundry> (accessed January 13, 2022).
7. What Is the Difference Between Home Laundry and Laundromat Prices. *Fiscal Tiger*, December 14, 2019. <https://www.fiscaltiger.com/what-is-the-difference-between-home-laundry-and-laundromat-prices/> (accessed January 13, 2022).
8. Chauhan P, Hellstorm S, Hughes J, Rothberg J. Survey: In the US, people say their use of masks may endure. July 1, 2020. <https://www.mckinsey.com/featured-insights/americas/survey-in-the-us-people-say-their-use-of-masks-may-endure> (accessed January 10 2022).
9. Weinstein MC, Siegel JE, Gold MR, Kamlet MS, Russell LB. Recommendations of the Panel on Cost-effectiveness in Health and Medicine. *JAMA* 1996; **276**(15): 1253-8.
10. Sanders GD, Neumann PJ, Basu A, et al. Recommendations for Conduct, Methodological Practices, and Reporting of Cost-effectiveness Analyses: Second Panel on Cost-Effectiveness in Health and Medicine. *JAMA* 2016; **316**(10): 1093-103.
11. Centers for Disease Control and Prevention. United States COVID-19 Cases and Deaths by State over Time. October 1, 2021. <https://data.cdc.gov/Case-Surveillance/United-States-COVID-19-Cases-and-Deaths-by-State-o/9mfq-cb36> (accessed October 2 2021).
12. National Center for Immunization and Respiratory Diseases (NCIRD), Division of Viral Diseases. Estimated Disease Burden of COVID-19. January 19, 2021 2021. <https://www.cdc.gov/coronavirus/2019-ncov/cases-updates/burden.html> (accessed February 3 2021).
13. Kalish H, Klumpp-Thomas C, Hunsberger S, et al. Mapping a Pandemic: SARS-CoV-2 Seropositivity in the United States. *medRxiv* 2021.
14. Bruckner TA, Parker DM, Bartell SM, et al. Estimated seroprevalence of SARS-CoV-2 antibodies among adults in Orange County, California. *Sci Rep* 2021; **11**(1): 3081.
15. Centers for Disease Control and Prevention. COVID Data Tracker. October 1, 2022 2022. <https://covid.cdc.gov/covid-data-tracker/#datatracker-home> (accessed October 2, 2021).
16. Institute for Health Metrics and Evaluation. COVID-19 Results Briefing. March 6, 2021. [http://www.healthdata.org/sites/default/files/files/Projects/COVID/2021/102\\_briefing\\_United\\_States\\_of\\_America\\_4.pdf](http://www.healthdata.org/sites/default/files/files/Projects/COVID/2021/102_briefing_United_States_of_America_4.pdf).

17. Crane MA, Shermock KM, Omer SB, Romley JA. Change in Reported Adherence to Nonpharmaceutical Interventions During the COVID-19 Pandemic, April-November 2020. *JAMA* 2021; **325**(9): 883-5.
18. Guy GP, Jr., Lee FC, Sunshine G, et al. Association of State-Issued Mask Mandates and Allowing On-Premises Restaurant Dining with County-Level COVID-19 Case and Death Growth Rates - United States, March 1-December 31, 2020. *MMWR Morb Mortal Wkly Rep* 2021; **70**(10): 350-4.
19. Institute for Health Metrics and Evaluation. COVID-19 Projections - United States of America: Social distancing. March 11, 2021 2021. <https://covid19.healthdata.org/united-states-of-america?view=social-distancing&tab=trend> (accessed March 12 2021).
20. Centers for Disease Control and Prevention. COVID-19 Case Surveillance Public Use Data. October 1, 2021. <https://data.cdc.gov/Case-Surveillance/COVID-19-Case-Surveillance-Public-Use-Data/vbim-akqf> (accessed October 2, 2021).
21. Centers for Disease Control and Prevention. Demographic Trends of COVID-19 cases and deaths in the US reported to CDC. October 1, 2021. <https://covid.cdc.gov/covid-data-tracker/#demographics> (accessed October 2 2021).
22. Shaman J, Pitzer VE, Viboud C, Grenfell BT, Lipsitch M. Absolute humidity and the seasonal onset of influenza in the continental United States. *PLoS Biol* 2010; **8**(2): e1000316.
23. Li Q, Guan X, Wu P, et al. Early transmission dynamics in Wuhan, China, of novel coronavirus–infected pneumonia. *New England Journal of Medicine* 2020.
24. Ling Y, Xu S, Lin Y, et al. The persistence and clearance of viral RNA in 2019 novel coronavirus disease survivors. *Chinese Medical Journal* 2020; **133**(9): 1039-43.
25. Wolfel R, Corman VM, Guggemos W, et al. Virological assessment of hospitalized patients with COVID-2019. *Nature* 2020; **581**(7809): 465-9.
26. Chang, Mo G, Yuan X, et al. Time Kinetics of Viral Clearance and Resolution of Symptoms in Novel Coronavirus Infection. *Am J Respir Crit Care Med* 2020; **201**(9): 1150-2.
27. To KK, Tsang OT, Leung WS, et al. Temporal profiles of viral load in posterior oropharyngeal saliva samples and serum antibody responses during infection by SARS-CoV-2: an observational cohort study. *Lancet Infect Dis* 2020.
28. Biomedical Advanced Research and Development Authority (BARDA). BARDA’s Rapidly Expanding: COVID-19 Medical Countermeasure Portfolio. November 11, 2020 2020. <https://www.medicalcountermeasures.gov/app/barda/coronavirus/COVID19.aspx?filter=vaccine> (accessed November 12 2020).
29. American Hospital Association. CMS to Increase Medicare Payment for COVID-19 Vaccine Administration. March 15, 2021. <https://www.aha.org/2021-03-15-cms-increase-medicare-payment-covid-19-vaccine-administration> (accessed January 4 2022).
30. Centers for Medicare & Medicaid Services (CMS). Medicare COVID-19 Vaccine Shot Payment. 09/29/2021 2021. <https://www.cms.gov/medicare/covid-19/medicare-covid-19-vaccine-shot-payment> (accessed 10/13 2021).
31. Bureau of Labor Statistics. Occupational employment statistics: May 2018 national occupational employment and wage estimates, United States. April 2, 2019 2018. [https://www.bls.gov/oes/current/oes\\_nat.htm](https://www.bls.gov/oes/current/oes_nat.htm) (accessed October 9 2019).
32. Centers for Medicare & Medicaid Services (CMS). Physician Fee Schedule. 2020. <https://www.cms.gov/apps/physician-fee-schedule/> (accessed April 13 2020).

33. Walgreens Co. Price listing. 2020. <https://www.walgreens.com> March 17, 2020).
34. United States Department of Health & Human Services. HCUP facts and figures: statistics on hospital-based care in the United States. 2016. <https://hcupnet.ahrq.gov/#setup> (accessed March 17 2020).
35. Yang B, Huang AT, Garcia-Carreras B, et al. Effect of specific non-pharmaceutical intervention policies on SARS-CoV-2 transmission in the counties of the United States. *Nat Commun* 2021; **12**(1): 3560.
36. Liu W, Russell RM, Bibollet-Ruche F, et al. Predictors of Nonseroconversion after SARS-CoV-2 Infection. *Emerg Infect Dis* 2021; **27**(9): 2454-8.
37. Oved K, Olmer L, Shemer-Avni Y, et al. Multi-center nationwide comparison of seven serology assays reveals a SARS-CoV-2 non-responding seronegative subpopulation. *EClinicalMedicine* 2020; **29**: 100651.
38. Grannis SJ, Rowley EA, Ong TC, et al. Interim Estimates of COVID-19 Vaccine Effectiveness Against COVID-19-Associated Emergency Department or Urgent Care Clinic Encounters and Hospitalizations Among Adults During SARS-CoV-2 B.1.617.2 (Delta) Variant Predominance - Nine States, June-August 2021. *MMWR Morb Mortal Wkly Rep* 2021; **70**(37): 1291-3.
39. Zhu FC, Guan XH, Li YH, et al. Immunogenicity and safety of a recombinant adenovirus type-5-vectored COVID-19 vaccine in healthy adults aged 18 years or older: a randomised, double-blind, placebo-controlled, phase 2 trial. *Lancet* 2020; **396**(10249): 479-88.
40. Anderson EJ, Roupheal NG, Widge AT, et al. Safety and Immunogenicity of SARS-CoV-2 mRNA-1273 Vaccine in Older Adults. *N Engl J Med* 2020.
41. Folegatti PM, Ewer KJ, Aley PK, et al. Safety and immunogenicity of the ChAdOx1 nCoV-19 vaccine against SARS-CoV-2: a preliminary report of a phase 1/2, single-blind, randomised controlled trial. *Lancet* 2020; **396**(10249): 467-78.
42. Witberg G, Barda N, Hoss S, et al. Myocarditis after Covid-19 Vaccination in a Large Health Care Organization. *N Engl J Med* 2021.
43. CDC Covid- Response Team, Administration FD. Allergic Reactions Including Anaphylaxis After Receipt of the First Dose of Moderna COVID-19 Vaccine - United States, December 21, 2020-January 10, 2021. *MMWR Morb Mortal Wkly Rep* 2021; **70**(4): 125-9.
44. CDC Covid- Response Team, Food & Drug Administration. Allergic Reactions Including Anaphylaxis After Receipt of the First Dose of Pfizer-BioNTech COVID-19 Vaccine - United States, December 14-23, 2020. *MMWR Morb Mortal Wkly Rep* 2021; **70**(2): 46-51.
45. Oran DP, Topol EJ. Prevalence of Asymptomatic SARS-CoV-2 Infection : A Narrative Review. *Ann Intern Med* 2020; **173**(5): 362-7.
46. Centers for Disease Control and Prevention. COVID-19 Pandemic Planning Scenarios. May 20, 2020 2020. <https://www.cdc.gov/coronavirus/2019-ncov/hcp/planning-scenarios.html> (accessed June 1 2020).
47. Stokes EK, Zambrano LD, Anderson KN, et al. Coronavirus Disease 2019 Case Surveillance - United States, January 22-May 30, 2020. *MMWR Morb Mortal Wkly Rep* 2020; **69**(24): 759-65.
48. Centers for Disease Control and Prevention. COVID-19 Pandemic Planning Scenarios. September 10, 2020. <https://www.cdc.gov/coronavirus/2019-ncov/hcp/planning-scenarios.html> (accessed December 15 2020).



49. National Center for Health Statistics. Weekly Updates by Select Demographic and Geographic Characteristics: Provisional Death Counts for Coronavirus Disease 2019 (COVID-19). January 27, 2021 2021. [https://www.cdc.gov/nchs/nvss/vsrr/covid\\_weekly/index.htm](https://www.cdc.gov/nchs/nvss/vsrr/covid_weekly/index.htm) (accessed February 3 2021).
50. Guan WJ, Ni ZY, Hu Y, et al. Clinical Characteristics of Coronavirus Disease 2019 in China. *N Engl J Med* 2020.
51. Arentz M, Yim E, Klaff L, et al. Characteristics and Outcomes of 21 Critically Ill Patients With COVID-19 in Washington State. *JAMA* 2020.
52. Richardson S, Hirsch JS, Narasimhan M, et al. Presenting Characteristics, Comorbidities, and Outcomes Among 5700 Patients Hospitalized With COVID-19 in the New York City Area. *JAMA* 2020.
53. Gold JAW, Wong KK, Szablewski CM, et al. Characteristics and Clinical Outcomes of Adult Patients Hospitalized with COVID-19 - Georgia, March 2020. *MMWR Morb Mortal Wkly Rep* 2020; **69**(18): 545-50.
54. Bhatraju PK, Ghassemieh BJ, Nichols M, et al. Covid-19 in Critically Ill Patients in the Seattle Region - Case Series. *N Engl J Med* 2020; **382**(21): 2012-22.
55. Auld SC, Caridi-Scheible M, Blum JM, et al. ICU and Ventilator Mortality Among Critically Ill Adults With Coronavirus Disease 2019. *Crit Care Med* 2020.
56. Davis HE, Assaf GS, McCorkell L, et al. Characterizing long COVID in an international cohort: 7 months of symptoms and their impact. *EClinicalMedicine* 2021; **38**: 101019.
57. Prosser LA, O'Brien MA, Molinari N-AM, et al. Non-traditional settings for influenza vaccination of adults. Costs and cost effectiveness. *Pharmacoeconomics* 2008; **26**(2): 163-78.
58. Arashiro T, Furukawa K, Nakamura A. COVID-19 in 2 Persons with Mild Upper Respiratory Symptoms on a Cruise Ship, Japan. *Emerg Infect Dis* 2020; **26**(6).
59. Duszynski T. What Does It Mean to 'Recover From Coronavirus'? Here's What You Need to Know. *Science Alert Health* April 11, 2020. <https://www.sciencealert.com/this-is-what-it-means-to-recover-from-corona-and-what-you-can-do-after> (accessed).
60. Garg S, Kim L, Whitaker M, et al. Hospitalization Rates and Characteristics of Patients Hospitalized with Laboratory-Confirmed Coronavirus Disease 2019 — COVID-NET, 14 States, March 1–30, 2020. *Morbidity and Mortality Weekly Report* ePub: 8 April 2020.
61. Huang C, Wang Y, Li X, et al. Clinical features of patients infected with 2019 novel coronavirus in Wuhan, China. *Lancet* 2020; **395**(10223): 497-506.
62. Lewnard JA, Liu VX, Jackson ML, et al. Incidence, clinical outcomes, and transmission dynamics of severe coronavirus disease 2019 in California and Washington: prospective cohort study. *BMJ* 2020; **369**: m1923.
63. Imam Z, Odish F, Gill I, et al. Older age and comorbidity are independent mortality predictors in a large cohort of 1305 COVID-19 patients in Michigan, United States. *J Intern Med* 2020.
64. Gold MR, Franks P, McCoy KI, Fryback DG. Toward consistency in cost-utility analyses: using national measures to create condition-specific values. *Medical Care* 1998; **36**(6): 778-92.
65. Smith KJ, Lee BY, Nowalk MP, Raymund M, Zimmerman RK. Cost-effectiveness of dual influenza and pneumococcal vaccination in 50-year-olds. *Vaccine* 2010; **28**: 7620-5.
66. Smith KJ, Roberts MS. Cost-effectiveness of newer treatment strategies for influenza. *American Journal of Medicine* 2002; **113**: 300-7.



67. Rothberg MB, Rose DN. Vaccination versus treatment of influenza in working adults: a cost-effective analysis. *American Journal of Medicine* 2005; **118**(1): 68-77.
68. Khazeni N, Hutton DW, Garber AM, Hupert N, Owens DK. Effectiveness and cost-effectiveness of vaccination against pandemic influenza (H1N1) 2009. *Ann Intern Med* 2009; **151**(12): 829-39.
69. Talbird SE, Brogan AJ, Winiarski AP, Sander B. Cost-effectiveness of treating influenzalike illness with oseltamivir in the United States. *American Journal of Health-System Pharmacy* 2009; **66**: 469-80.
70. Luce BR, Nichol KL, Belshe RB, et al. Cost-effectiveness of live attenuated influenza vaccine versus inactivated influenza vaccine among children ages 24-59 months in the United States. *Vaccine* 2008; **26**(23): 2841-8.
71. Perloth DJ, Glass RJ, Davey VJ, Cannon D, Garber AM, Owens DK. Health outcomes and costs of community mitigation strategies for an influenza pandemic in the United States. *Clin Infect Dis* 2010; **50**(2): 165-74.
72. Michaelidis CI, Zimmerman RK, Nowalk MP, Smith KJ. Estimating the cost-effectiveness of a national program to eliminate disparities in influenza vaccination rates among elderly minority groups. *Vaccine* 2011; **29**(19): 3525-30.
73. Mauskopf JA, Cates SC, Griffin AD, Neighbors DM, Lamb SC, Rutherford C. Cost effectiveness of zanamivir for the treatment of influenza in a high risk population in Australia. *Pharmacoeconomics* 2000; **17**(6): 611-20.
74. Lee BY, Tai JHY, Bailey RR, Smith KJ, Nowalk AJ. Economics of influenza vaccine administration timing for children. *American Journal of Managed Care* 2010; **16**(3): e75-e85.
75. Jit M, Cromer D, Baguelin M, Stowe J, Andrews N, Miller E. The cost-effectiveness of vaccinating pregnant women against seasonal influenza in England and Wales. *Vaccine* 2010; **29**(1): 115-22.
76. Jiang Y, Yang X, Taniguchi K, Petigara T, Abe M. A cost-effectiveness analysis of revaccination and catch-up strategies with the 23-valent pneumococcal polysaccharide vaccine (PPV23) in older adults in Japan. *Journal of medical economics* 2018; **21**(7): 687-97.
77. Kotirum S, Muangchana C, Techathawat S, Dilokthornsakul P, Wu DB-C, Chaiyakunapruk N. economic evaluation and Budget impact analysis of Vaccination against Haemophilus influenzae Type b infection in Thailand. *Frontiers in public health* 2017; **5**: 289.
78. Lapointe-Shaw L, Voruganti T, Kohler P, Thein H-H, Sander B, McGeer A. Cost-effectiveness analysis of universal screening for carbapenemase-producing Enterobacteriaceae in hospital inpatients. *European Journal of Clinical Microbiology & Infectious Diseases* 2017; **36**(6): 1047-55.
79. Willem L, Blommaert A, Hanquet G, et al. Economic evaluation of pneumococcal vaccines for adults aged over 50 years in Belgium. *Human vaccines & immunotherapeutics* 2018; **14**(5): 1218-29.
80. Wu D, Chaiyakunapruk N, Pratoomsoot C, et al. Cost-utility analysis of antiviral use under pandemic influenza using a novel approach—linking pharmacology, epidemiology and health economics. *Epidemiology & Infection* 2018; **146**(4): 496-507.
81. Beauchemin C, Letarte N, Mathurin K, Yelle L, Lachaine J. A global economic model to assess the cost-effectiveness of new treatments for advanced breast cancer in Canada. *Journal of medical economics* 2016; **19**(6): 619-29.

82. Fowler RA, Hill-Popper M, Stasinou J, Petrou C, Sanders GD, Garber AM. Cost-effectiveness of recombinant human activated protein C and the influence of severity of illness in the treatment of patients with severe sepsis. *Journal of critical care* 2003; **18**(3): 181-91.
83. Huang DT, Clermont G, Dremsizov TT, Angus DC, Investigators P. Implementation of early goal-directed therapy for severe sepsis and septic shock: a decision analysis. *Critical care medicine* 2007; **35**(9): 2090-100.
84. Kip MM, van Oers JA, Shajiei A, et al. Cost-effectiveness of procalcitonin testing to guide antibiotic treatment duration in critically ill patients: results from a randomised controlled multicentre trial in the Netherlands. *Critical Care* 2018; **22**(1): 1-10.
85. Lee BY, Wiringa AE, Bailey RR, Lewis GJ, Feura J, Muder RR. Staphylococcus aureus vaccine for orthopedic patients: an economic model and analysis. *Vaccine* 2010; **28**(12): 2465-71.
86. Stevenson SM, Danzig MR, Ghandour RA, et al. Cost-effectiveness of neoadjuvant chemotherapy before radical cystectomy for muscle-invasive bladder cancer. *Urologic Oncology: Seminars and Original Investigations*; 2014: Elsevier; 2014. p. 1172-7.
87. Wu DBC, Chaiyakunapruk N, Pratoomsot C, et al. Cost-utility analysis of antiviral use under pandemic influenza using a novel approach - linking pharmacology, epidemiology and health economics. *Epidemiol Infect* 2018; **146**(4): 496-507.
88. Liu Q, Luo X, Peng L, et al. Cost-effectiveness analysis of adding ramucirumab to the first-line erlotinib treatment for untreated EGFR-mutated metastatic non-small cell lung cancer in China. *BMJ Open* 2020; **10**(11): e040691.
89. Lim EA, Lee H, Bae E, Lim J, Shin YK, Choi SE. Economic Evaluation of Companion Diagnostic Testing for EGFR Mutations and First-Line Targeted Therapy in Advanced Non-Small Cell Lung Cancer Patients in South Korea. *PLoS One* 2016; **11**(8): e0160155.
90. Soto-Perez-de-Celis E, Aguiar PN, Cordon ML, Chavarri-Guerra Y, Lopes GL. Cost-Effectiveness of Cabozantinib in the Second-Line Treatment of Advanced Hepatocellular Carcinoma. *J Natl Compr Canc Netw* 2019; **17**(6): 669-75.
91. Ramamurthy C, Handorf EA, Correa AF, Beck JR, Geynisman DM. Cost-effectiveness of abiraterone versus docetaxel in the treatment of metastatic hormone naive prostate cancer. *Urol Oncol* 2019; **37**(10): 688-95.
92. Coleman CI, Limone BL. Universal versus platelet reactivity assay-driven use of P2Y12 inhibitors in acute coronary syndrome patients: cost-effectiveness analyses for six European perspectives. *Thromb Haemost* 2014; **111**(1): 103-10.
93. Troyer JL, Jones AE, Shapiro NI, Mitchell AM, Hewer I, Kline JA. Cost-effectiveness of quantitative pretest probability intended to reduce unnecessary medical radiation exposure in emergency department patients with chest pain and dyspnea. *Acad Emerg Med* 2015; **22**(5): 525-35.
94. Driessen MT, Whalen J, Seewoodharry Buguth B, et al. Cost-effectiveness analysis of umeclidinium bromide/vilanterol 62.5/25 mcg versus tiotropium/olodaterol 5/5 mcg in symptomatic patients with chronic obstructive pulmonary disease: a Spanish National Healthcare System perspective. *Respir Res* 2018; **19**(1): 224.
95. Perez-Aranda A, D'Amico F, Feliu-Soler A, et al. Cost-Utility of Mindfulness-Based Stress Reduction for Fibromyalgia versus a Multicomponent Intervention and Usual Care: A 12-Month Randomized Controlled Trial (EUDAEMON Study). *J Clin Med* 2019; **8**(7).

96. Erickson KF, Japa S, Owens DK, Chertow GM, Garber AM, Goldhaber-Fiebert JD. Cost-effectiveness of statins for primary cardiovascular prevention in chronic kidney disease. *J Am Coll Cardiol* 2013; **61**(12): 1250-8.
97. Luciano JV, D'Amico F, Cerda-Lafont M, et al. Cost-utility of cognitive behavioral therapy versus U.S. Food and Drug Administration recommended drugs and usual care in the treatment of patients with fibromyalgia: an economic evaluation alongside a 6-month randomized controlled trial. *Arthritis Res Ther* 2014; **16**(5): 451.
98. Centers for Disease Control and Prevention. COVID-19 Case Surveillance Public Use Data. September 30, 2020. <https://data.cdc.gov/Case-Surveillance/COVID-19-Case-Surveillance-Public-Use-Data/vbim-akqf> (accessed October 12 2020).
